# Supplementary material
Source: publisher site journal article supplement (https://www.dovepress.com/article/78301)
Supplement: Supplementary file 1 [file get_supplementary_file.php]

**Table S1** Conversion of TNM classification system to summary staging

| Summary staging | TNM                                                                                                                                                                                                                            |
|-----------------|--------------------------------------------------------------------------------------------------------------------------------------------------------------------------------------------------------------------------------|
| Local           | T1–4, N0, M0<br>T1–2, N0, Mx <sup>a</sup><br>T1, Nx <sup>a</sup> , M0 or Mx <sup>a</sup>                                                                                                                                       |
| Regional        | T1–4 or Tx <sup>a</sup> , N1–3, M0                                                                                                                                                                                             |
| Distant         | Any T, Any N, M1                                                                                                                                                                                                               |
| Unknown         | T2–4 or Tx <sup>a</sup> , Nx, M0 or Mx <sup>a</sup><br>T3–4 or Tx <sup>a</sup> , N0, Mx <sup>a</sup><br>T1–4 or Tx <sup>a</sup> , N1–3, Mx <sup>a</sup><br>T0, N1–3, M0–I or Mx <sup>a</sup><br>T0, N0 or Nx <sup>a</sup> , M1 |

**Note:** <sup>a</sup>x: variable not specified in the DCR.

**Abbreviations:** DCR, Danish Cancer Registry; TNM, tumor, nodes, metastasis.

**Table S2** Codes used to identify lung cancer, bone metastases, and SRE in the DNRP

|                                                                                           |
|-------------------------------------------------------------------------------------------|
| <b>Lung cancer (ICD-10 codes)</b>                                                         |
| C33–C34: Malignant neoplasm of the trachea, bronchus, and lung                            |
| <b>Bone metastasis (ICD-10 codes)</b>                                                     |
| C795: Secondary malignant neoplasm of bone and bone marrow                                |
| <b>Pathological fracture (ICD-10 codes)</b>                                               |
| M84.4: Fracture of bone in neoplastic disease                                             |
| M90.7: Fracture of bone in neoplastic disease                                             |
| S12.0–I2.9: Fracture of neck                                                              |
| S22.0: Fracture of thoracic vertebra                                                      |
| S22.1: Multiple fractures of thoracic spine                                               |
| S32.0–S32.8: Fracture of lumbar spine and pelvis                                          |
| S52.5–S52.6: Fracture of lower end of radius and/or ulna                                  |
| S72.0–72.9: Fracture of femur                                                             |
| <b>Spinal cord compression (ICD-10 codes)</b>                                             |
| M43.9: Deforming dorsopathy, unspecified                                                  |
| M48.5: Collapsed vertebra, not elsewhere classified                                       |
| M49.5: Collapse vertebra I disease classified elsewhere. Metastatic fracture of vertebrae |
| G95.2: Cord compression, unspecified                                                      |
| G95.8: Other specified diseases of spinal cord                                            |
| <b>Surgery to bone (NOMESCO classification of surgical procedure code)</b>                |
| KNxJxxe: Surgical fracture treatment                                                      |
| <b>Radiation therapy (Danish treatment code)</b>                                          |
| BWGC1: Conventional external radiation therapy                                            |

**Abbreviations:** DNPR, Danish National Registry of Patients; ICD-10, 10th revision of the International Classification of Diseases; NOMESCO, Nordic medico-statistical committee; SRE, skeletal-related event.
